# Supplementary material for: High-throughput microscopy exposes a pharmacological window in which dual leucine zipper kinase inhibition preserves neuronal network connectivity
Source: PubMed Central journal article supplement (PMC6549294; doi:10.1186/s40478-019-0741-3), 2019-06-04
Supplement: 40478_2019_741_MOESM11_ESM.pdf [file 40478_2019_741_MOESM11_ESM.pdf]

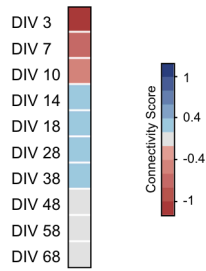

Additional file 11: **Figure S10**. Extended culture age reduces neuronal connectivity. Connectivity scores based on z-scores from cortical cultures grown for an extended period of time. Neuronal connectivity increased during the first two weeks, after which it stagnated up to five and a half weeks. From DIV 38 onwards age-related loss of neuronal connectivity was detected (Morph.:  $n_{\text{bio}} = 1 \times n_{\text{tech}} = 6$  - Func.:  $n_{\text{bio}} = 1 \times n_{\text{tech}} = 9$ ).
