# Supplementary material for: High-throughput microscopy exposes a pharmacological window in which dual leucine zipper kinase inhibition preserves neuronal network connectivity
Source: Springer Nature journal article supplement (doi:10.1186/s40478-019-0741-3), 2019-06-04
Supplement: MOESM1 [file 25666802]

Additional file 1: **Table S1.** All descriptors for the dendrite network, the synapse markers, the nuclei and functional (calcium) activity. Measurements are reported per field of view.

| Descriptor                      | Set       | Explanation                                                                                           | Unit                           |
|---------------------------------|-----------|-------------------------------------------------------------------------------------------------------|--------------------------------|
| ChannelDendrite_Contrast        | Dendrites | Haralick texture descriptor                                                                           | /                              |
| ChannelDendrite_Correlation     | Dendrites | Haralick texture descriptor                                                                           | /                              |
| ChannelDendrite_Homogeneity     | Dendrites | Haralick texture descriptor                                                                           | /                              |
| ChannelDendrite_Intensity       | Dendrites | Haralick texture descriptor                                                                           | /                              |
| ChannelDendrite_IntensityStddev | Dendrites | Haralick texture descriptor                                                                           | /                              |
| ChannelDendrite_SumVariance     | Dendrites | Haralick texture descriptor                                                                           | /                              |
| Dendrite_Area                   | Dendrites | MAP2 positive area                                                                                    | $\mu\text{m}^2$                |
| Dendrite_AreaPerNucleus         | Dendrites | MAP2 positive area normalised to the number of neuronal nuclei                                        | $\mu\text{m}^2/\text{nucleus}$ |
| Dendrite_AreaSearch             | Dendrites | Dilated MAP2 positive area with exclusion of neuronal nuclei                                          | $\mu\text{m}^2$                |
| Dendrite_Int                    | Dendrites | MAP2 intensity in the dendrite mask                                                                   | AU                             |
| Dendrite_Int_sd                 | Dendrites | Standard deviation of the MAP2 intensity in the dendrite mask                                         | /                              |
| Dendrite_IntSpot1               | Dendrites | Synaptophysin intensity in the dendrite mask                                                          | AU                             |
| Dendrite_IntSpot2               | Dendrites | PSD-95 intensity in the dendrite mask                                                                 | AU                             |
| Dendrite_Length                 | Dendrites | Length of the skeletonised dendrite network                                                           | $\mu\text{m}$                  |
| Dendrite_LengthPerNucleus       | Dendrites | Length of the skeletonised dendrite network normalised to the number of neuronal nuclei               | $\mu\text{m}/\text{nucleus}$   |
| Dendrite_Nodes                  | Dendrites | Number of branch points in the skeletonised dendrite network                                          | #                              |
| Dendrite_Width_Max              | Dendrites | Maximal width of the dendrites                                                                        | $\mu\text{m}$                  |
| Dendrite_Width_Mean             | Dendrites | Average width of the dendrites                                                                        | $\mu\text{m}$                  |
| ChannelSpot1_Contrast           | Synapses  | Haralick texture descriptor                                                                           | /                              |
| ChannelSpot1_Correlation        | Synapses  | Haralick texture descriptor                                                                           | /                              |
| ChannelSpot1_Homogeneity        | Synapses  | Haralick texture descriptor                                                                           | /                              |
| ChannelSpot1_Intensity          | Synapses  | Haralick texture descriptor                                                                           | /                              |
| ChannelSpot1_IntensityStddev    | Synapses  | Haralick texture descriptor                                                                           | /                              |
| ChannelSpot1_SumVariance        | Synapses  | Haralick texture descriptor                                                                           | /                              |
| ChannelSpot2_Contrast           | Synapses  | Haralick texture descriptor                                                                           | /                              |
| ChannelSpot2_Correlation        | Synapses  | Haralick texture descriptor                                                                           | /                              |
| ChannelSpot2_Homogeneity        | Synapses  | Haralick texture descriptor                                                                           | /                              |
| ChannelSpot2_Intensity          | Synapses  | Haralick texture descriptor                                                                           | /                              |
| ChannelSpot2_IntensityStddev    | Synapses  | Haralick texture descriptor                                                                           | /                              |
| ChannelSpot2_SumVariance        | Synapses  | Haralick texture descriptor                                                                           | /                              |
| PearsonCorr                     | Synapses  | Correlation of synaptophysin and PSD-95 signal within dendrite mask                                   | /                              |
| SimilarityIndex                 | Synapses  | Number of overlapping pre- and postsynaptic pixels divided by the sum of pre- and postsynaptic pixels | /                              |
| Spot1_Area                      | Synapses  | Average area of presynaptic spots                                                                     | $\mu\text{m}^2$                |
| Spot1_Count                     | Synapses  | Presynaptic count                                                                                     | #                              |
| Spot1_DensityArea               | Synapses  | Presynaptic count normalised to dendrite area                                                         | $\#/\mu\text{m}^2$             |
| Spot1_DensityLength             | Synapses  | Presynaptic count normalised to dendrite length                                                       | $\#/\mu\text{m}$               |
| Spot1_Int                       | Synapses  | Average intensity of presynaptic spots                                                                | AU                             |
| Spot1_Overlap                   | Synapses  | Average ratio of overlapping pixels with postsynaptic spots                                           | /                              |
| Spot1_PercWithOverlap           | Synapses  | Percentage of presynaptic spots that overlap with postsynaptic spots                                  | %                              |
| Spot2_Area                      | Synapses  | Average area of postsynaptic spots                                                                    | $\mu\text{m}^2$                |
| Spot2_Count                     | Synapses  | Postsynaptic count                                                                                    | #                              |
| Spot2_DensityArea               | Synapses  | Postsynaptic count normalised to dendrite area                                                        | $\#/\mu\text{m}^2$             |
| Spot2_DensityLength             | Synapses  | Postsynaptic count normalised to dendrite length                                                      | $\#/\mu\text{m}$               |
| Spot2_Int                       | Synapses  | Average intensity of postsynaptic spots                                                               | AU                             |
| Spot2_Overlap                   | Synapses  | Average ratio of overlapping pixels with presynaptic spots                                            | /                              |
| Spot2_PercWithOverlap           | Synapses  | Percentage of postsynaptic spots that overlap with presynaptic spots                                  | %                              |
| Synapses_Area                   | Synapses  | Average area of synapses                                                                              | $\mu\text{m}^2$                |
| Synapses_Count                  | Synapses  | Synaptic count                                                                                        | #                              |
| Synapses_Density                | Synapses  | Synaptic count normalised to dendrite area                                                            | $\#/\mu\text{m}^2$             |
| Synapses_IntRatio               | Synapses  | Intensity of synaptophysin over the intensity of PSD-95 in synapses                                   | /                              |
| Spot1_IntBg                     | Synapses  | Background intensity in dendrite mask of synaptophysin                                                | AU                             |
| Spot2_IntBg                     | Synapses  | Background intensity in dendrite mask of PSD-95                                                       | AU                             |
| Spot1_SBR                       | Synapses  | Signal to background ratio of synaptophysin                                                           | /                              |
| Spot2_SBR                       | Synapses  | Signal to background ratio of PSD-95                                                                  | /                              |
| ChannelNuclei_Contrast          | Nuclei    | Haralick texture descriptor                                                                           | /                              |
| ChannelNuclei_Correlation       | Nuclei    | Haralick texture descriptor                                                                           | /                              |
| ChannelNuclei_Homogeneity       | Nuclei    | Haralick texture descriptor                                                                           | /                              |
| ChannelNuclei_Intensity         | Nuclei    | Haralick texture descriptor                                                                           | /                              |
| ChannelNuclei_IntensityStddev   | Nuclei    | Haralick texture descriptor                                                                           | /                              |
| ChannelNuclei_SumVariance       | Nuclei    | Haralick texture descriptor                                                                           | /                              |
| Nuclei_Area                     | Nuclei    | Average area of nuclei                                                                                | $\mu\text{m}^2$                |
| Nuclei_Count                    | Nuclei    | Nuclear count                                                                                         | #                              |
| Nuclei_Int                      | Nuclei    | Average intensity of nuclei                                                                           | AU                             |
| Nuclei_Int_relDev               | Nuclei    | Average standard deviation of intensities within nuclei                                               | /                              |
| Nuclei_IntNeu                   | Nuclei    | Average intensity of MAP2 within nuclear mask                                                         | AU                             |
| Nuclei_IntSpot1                 | Nuclei    | Average intensity of synaptophysin within nuclear mask                                                | AU                             |
| Nuclei_IntSpot2                 | Nuclei    | Average intensity of PSD95 within nuclear mask                                                        | AU                             |

|                               |            |                                                                      |                 |
|-------------------------------|------------|----------------------------------------------------------------------|-----------------|
| Nuclei_Neuronal_Area          | Nuclei     | Average area of neuronal nuclei                                      | $\mu\text{m}^2$ |
| Nuclei_Neuronal_Count         | Nuclei     | Neuronal nuclear count                                               | #               |
| Nuclei_Neuronal_Int           | Nuclei     | Average intensity of neuronal nuclei                                 | AU              |
| Nuclei_Neuronal_Int_relDev    | Nuclei     | Average standard deviation of intensities within neuronal nuclei     | /               |
| Nuclei_Neuronal_IntNeu        | Nuclei     | Average intensity of MAP2 within neuronal nuclear mask               | AU              |
| Nuclei_Neuronal_IntSpot1      | Nuclei     | Average intensity of synaptophysin within neuronal nuclear mask      | AU              |
| Nuclei_Neuronal_IntSpot2      | Nuclei     | Average intensity of PSD95 within neuronal nuclear mask              | AU              |
| Nuclei_Neuronal_Perimeter     | Nuclei     | Average perimeter of neuronal nuclei                                 | $\mu\text{m}$   |
| Nuclei_Neuronal_Ratio         | Nuclei     | Ratio of neuronal nuclei                                             | /               |
| Nuclei_Neuronal_Roundness     | Nuclei     | Average roundness of neuronal nuclei                                 | /               |
| Nuclei_Neuronal_SERSpot       | Nuclei     | Average spot-like texture of neuronal nuclei                         | /               |
| Nuclei_NonNeuronal_Area       | Nuclei     | Average area of non-neuronal nuclei                                  | $\mu\text{m}^2$ |
| Nuclei_NonNeuronal_Count      | Nuclei     | Non-neuronal nuclear count                                           | #               |
| Nuclei_NonNeuronal_Int        | Nuclei     | Average intensity of non-neuronal nuclei                             | AU              |
| Nuclei_NonNeuronal_Int_relDev | Nuclei     | Average standard deviation of intensities within non-neuronal nuclei | /               |
| Nuclei_NonNeuronal_IntNeu     | Nuclei     | Average intensity of MAP2 within non-neuronal nuclear mask           | AU              |
| Nuclei_NonNeuronal_IntSpot1   | Nuclei     | Average intensity of synaptophysin within non-neuronal nuclear mask  | AU              |
| Nuclei_NonNeuronal_IntSpot2   | Nuclei     | Average intensity of PSD95 within non-neuronal nuclear mask          | AU              |
| Nuclei_NonNeuronal_Perimeter  | Nuclei     | Average perimeter of non-neuronal nuclei                             | $\mu\text{m}$   |
| Nuclei_NonNeuronal_Ratio      | Nuclei     | Ratio of non-neuronal nuclei                                         | /               |
| Nuclei_NonNeuronal_Roundness  | Nuclei     | Average roundness of non-neuronal nuclei                             | /               |
| Nuclei_NonNeuronal_SERSpot    | Nuclei     | Average spot-like texture of non-neuronal nuclei                     | /               |
| Nuclei_Perimeter              | Nuclei     | Average perimeter of nuclei                                          | /               |
| Nuclei_Roundness              | Nuclei     | Average roundness of nuclei                                          | /               |
| Nuclei_SERSpot                | Nuclei     | Average spot-like texture of nuclei                                  | /               |
| CA_cMeanAvBurstAmpl           | Functional | Average burst amplitude                                              | AU              |
| CA_cMeanAvBurstInterval       | Functional | Average burst interval                                               | s               |
| CA_cMeanAvDecayTime           | Functional | Average burst decay time                                             | s               |
| CA_cMeanBurstFreq             | Functional | Average burst frequency                                              | #/min           |
| CA_meanCorr                   | Functional | Correlation of bursts                                                | /               |
| CA_pctActiveNeurons           | Functional | Percentage of active neurons                                         | %               |
| CA_sMeanBurstInterval         | Functional | Average burst amplitude                                              | s               |
| CA_sSyncAvBurstAmpl           | Functional | Average burst amplitude of synchronous bursts                        | AU              |
| CA_sSyncBurstFreq             | Functional | Average burst frequency of synchronous bursts                        | s               |
| CA_sSyncMeanDecayTime         | Functional | Average burst decay time of synchronous bursts                       | #/min           |
